# Supplementary material for: α-Diimine-mediated C–H functionalization of arenes for aryl–aryl cross-coupling reactions
Source: Royal Society of Chemistry journal article supplement (doi:10.1039/d3ob01992f), 2024-01-01
Supplement: d3ob01992f1.pdf [file d3ob01992f1.pdf]

## Supporting information

### **$\alpha$ -Diimine-mediated C-H functionalization of arenes for aryl-aryl cross-coupling reactions**

Kotono Babaguchi,<sup>a</sup> Deepika Bedi,<sup>b</sup> Miguel Chacon Teran<sup>a</sup> and Michael Findlater<sup>a,\*</sup>

a. Department of Chemistry and Biochemistry, University of California Merced, Merced, CA  
95343, USA

b. Department of Chemistry and Biochemistry, Amity University Punjab, Mohali, Panjab 140306,  
India

### **Contents**

|                                                                                              |    |
|----------------------------------------------------------------------------------------------|----|
| 1. General Consideration.....                                                                | 2  |
| 2. Reaction condition screenings and base optimizations.....                                 | 3  |
| 3. General procedure for C <sub>Ar</sub> -C <sub>Ar</sub> formation.....                     | 4  |
| 4. Spectral data for products.....                                                           | 4  |
| 5. Qualitative competition study.....                                                        | 7  |
| 6. ICP-MS analysis on the contents of transition metals in <sup>dm</sup> BIAN.....           | 8  |
| 7. General procedure for Ar-BIAN catalysts.....                                              | 9  |
| 8. Mechanistic experiments.....                                                              | 12 |
| 8.1 KIE experiment.....                                                                      | 12 |
| 8.2 Crystal of the catalyst intermediate, C18-Crown-6.....                                   | 13 |
| 8.3 Reaction with isolated C18-Crown-6.....                                                  | 13 |
| 9. <sup>1</sup> H and <sup>13</sup> C NMRs of isolated C-C formed products and catalyst..... | 14 |
| 10. References.....                                                                          | 22 |

## 1. General Consideration

All reagents were purchased from commercial vendors and were used without further purification unless otherwise noted. Ar-BIAN (**L**<sub>1</sub>-**L**<sub>8</sub>) were synthesized according to the reported procedure.<sup>1</sup> All preparations of samples were performed under an inert atmosphere (Argon) using Schlenk and glovebox techniques unless otherwise noted. <sup>1</sup>H and <sup>13</sup>C NMR were recorded on an Agilent MR-DD2 400 MHz NMR spectrometer at 300K. <sup>1</sup>H NMR spectra were referenced to the solvent residual peak (CDCl<sub>3</sub>, δ 7.26 ppm and CD<sub>3</sub>OD, δ 3.31 ppm), and <sup>13</sup>C NMR spectra were referenced to the solvent residual peak (CDCl<sub>3</sub>, δ 77.16 ppm and CD<sub>3</sub>OD, δ 49.15 ppm). Data for <sup>1</sup>H NMR are recorded as follows: the chemical shifts are reported in (δ, ppm), multiplicity (br = broad, s = singlet, d = doublet, t = triplet, m = multiplet, dd = doublet of doublet), and coupling constants in Hz as absolute values. GC-MS data were acquired using Thermo Scientific ISQ Single Quadrupole system. ICP-MS analysis was performed on an Agilent 7500ce while X-ray crystallography was recorded on an XtaLab Synergy by Rigaku Oxford Diffraction.

## 2. Table S1: Reaction condition screenings and base optimizations

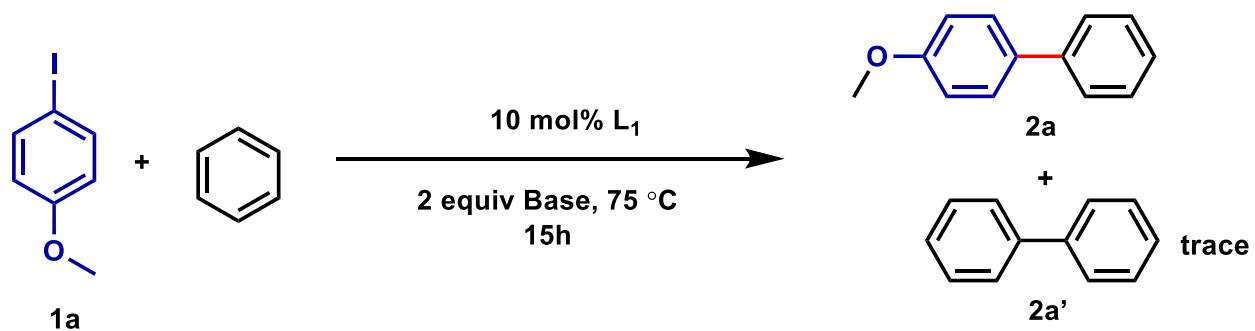

| Entry | Base                           | Conversion (%) <sup>a</sup> |
|-------|--------------------------------|-----------------------------|
| 1     | KOtBu                          | >99%                        |
| 2     | NaOtBu                         | <1%                         |
| 3     | Mg(OtBu) <sub>2</sub>          | <1%                         |
| 4     | Be(OtBu) <sub>2</sub>          | <1%                         |
| 5     | K <sub>2</sub> CO <sub>3</sub> | <1%                         |
| 6     | NaHBEt <sub>3</sub>            | <1%                         |
| 7     | NaH                            | <1%                         |

<sup>a</sup>Conversion determined by GC-MS

### 3. General procedure for C<sub>Ar</sub>-C<sub>Ar</sub> formation

An oven dried 20 mL scintillation vial was charged with <sup>dm</sup>BIAN (19.4 mg, 0.05 mmol), anhydrous benzene (2 mL), and a stir bar. A bright orange homogenous solution was obtained. Aryl halide (1.0 mmol) and KO<sup>t</sup>Bu (168.3 mg, 1.5 mmol) were then added to the reaction mixture. The scintillation vial was sealed and then placed on a preheated oil bath at 75 °C for 15 hrs. The reaction was quenched by exposing the reaction mixture to air, then the solvent was then reduced under *vacuo*. The crude products were purified by flash column chromatography using hexanes/ ethyl acetate mixture (95/5) as eluent to afford the desired products.

### 4. Spectral data for products

#### 4-Methoxybiphenyl (2a)<sup>2</sup>

<sup>1</sup>H NMR (400 MHz, CDCl<sub>3</sub>): δ = 7.57-7.44 (m, 4H), 7.40-7.35 (t, J = 7.6, 2H), 7.32-7.19 (m, 3H) 2.34 (s, 3H); <sup>13</sup>C NMR (100 MHz, CDCl<sub>3</sub>): δ = 159.3, 141.0, 133.9, 132.2, 128.9, 128.3, 126.9, 126.8, 114.3, 55.5.

#### 2-methylbiphenyl (2b)<sup>2</sup>

<sup>1</sup>H NMR (400 MHz, CD<sub>3</sub>OD) δ 7.43-7.20 (m, 9H), 2.21 (s, 3H); <sup>13</sup>C NMR (100 MHz, CD<sub>3</sub>OD) δ 143.4, 143.2, 136.2, 131.2, 130.6, 130.1, 129.1, 128.3, 127.8, 126.8, 20.6.

#### 3-Methylbiphenyl (2c)<sup>2</sup>

<sup>1</sup>H NMR (400 MHz, CD<sub>3</sub>OD) δ 7.58-7.54 (m, 2H), 7.43-7.27 (m, 6H), 7.15 (d, J = 7.5, 1H), 2.39 (s, 3H); <sup>13</sup>C NMR (100 MHz, CD<sub>3</sub>OD) δ 142.6, 142.4.2, 139.4, 129.7, 129.7, 128.9, 128.6, 128.2, 127.9, 125.1, 21.6.

#### 4-Methylbiphenyl (2d)<sup>3</sup>

<sup>1</sup>H NMR (400 MHz, CD<sub>3</sub>OD): δ = 7.57-7.44 (m, 4H), 7.40-7.35 (t, J = 7.6, 2H), 7.32-7.19 (m, 3H) 2.34 (s, 3H); <sup>13</sup>C NMR (100 MHz, CD<sub>3</sub>OD): δ = 142.3, 139.5, 138.0, 130.4, 129.8, 127.9, 127.7, 127.7, 21.1.

#### 3,5-Dimethylbiphenyl (2e)<sup>2</sup>

<sup>1</sup>H NMR (500 MHz, CDCl<sub>3</sub>): δ = 7.59-7.57 (m, 2H), 7.45-7.41 (m, 2H), 7.35-7.31 (m, 1H), 7.22 (s, 2H), 7.01 (s, 1H), 2.39 (s, 6H). <sup>13</sup>C NMR (100 MHz, CDCl<sub>3</sub>): δ = 141.6, 141.4, 138.4, 129.0, 128.7, 127.3, 127.2, 125.3, 21.6.

#### 2-phenylpyridine (2f)<sup>4</sup>

<sup>1</sup>H NMR (400 MHz, CD<sub>3</sub>OD) δ 8.56 (d, 1H, J = 3.68 Hz), 7.88 (d, 2H, J = 5.8 Hz), 7.83 (dt, 1H, J = 1.2, 6.1 Hz), 7.80-7.74 (m, 1H), 7.46-7.42 (m, 1H), 7.41-7.37 (m, 1H), 7.31 (dt, 1H, J = 1.1, 4.8 Hz); <sup>13</sup>C NMR (100 MHz, CD<sub>3</sub>OD) δ 158.6, 150.1, 140.2, 138.8, 130.1, 129.7, 127.9, 123.7, 122.4.

**3-phenylpyridine (2g)<sup>4</sup>**

<sup>1</sup>H NMR (400 MHz, CDCl<sub>3</sub>) δ 8.86-8.85 (m, 1H), 8.59 (dd, J = 4.8, 1.2 Hz, 1H), 7.87 (dt, J = 8.0, 1.86 Hz, 1H), 7.60-7.56 (m, 2H), 7.51-7.45 (m, 2H), 7.43-7.33 (m, 2H); <sup>13</sup>C NMR (100 MHz, CDCl<sub>3</sub>) δ 148.5, 148.3, 137.8, 134.4, 129.1, 128.1, 127.2, 126.7, 123.6.

**4-phenylpyridine (2h)<sup>4</sup>**

<sup>1</sup>H NMR (400 MHz, CDCl<sub>3</sub>) δ 8.7 (d, J = 5.08 Hz, 2H), 7.64-7.66 (m, 2H), 7.43-7.52 (m, 5H); <sup>13</sup>C NMR (100 MHz, CDCl<sub>3</sub>) δ 150.4, 148.5, 138.3, 129.2, 129.2, 127.1, 121.8.

**[1,1'-Biphenyl]-4-carbonitrile (2i)<sup>3</sup>**

<sup>1</sup>H NMR (400 MHz, CD<sub>3</sub>OD) δ 7.72-7.66 (m, 4H), 7.56 (d, J = 7.3 Hz, 2H), 7.44 (t, J = 7.4 Hz, 2H), 7.43 (t, J = 7.3 Hz, 1H); <sup>13</sup>C NMR (100 MHz, CD<sub>3</sub>OD) δ 146.7, 139.9, 133.7, 130.1, 128.7, 128.0, 127.9, 119.8, 111.3.

**4-aminobiphenyl (2j)<sup>3</sup>**

<sup>1</sup>H NMR (400 MHz, CD<sub>3</sub>OD): δ 7.49 (d, J = 7.52, 2H), 7.44-7.36 (m, 4H), 7.29-7.23 (m, 1H), 6.8 (d, J = 8.4 Hz, 2H); <sup>13</sup>C NMR (100 MHz, CD<sub>3</sub>OD): δ 146.8, 141.2, 131.1, 130.9, 128.3, 127.2, 125.7, 115.5.

**1-Phenyladamantane (2k)<sup>5</sup>**

<sup>1</sup>H NMR (400 MHz, CD<sub>3</sub>OD): δ 7.35 - 7.31 (m, 2H), 7.26 (t, J = 15.1, 2H), 7.15 (t, J = 7.2, 1H), 2.05 - 2.10 (m, 3H), 1.87 - 1.89 (m, 6H), 1.78 - 1.81 (m, 6H); <sup>13</sup>C NMR (100 MHz, CD<sub>3</sub>OD,): δ 151.0, 127.7, 125.1, 124.3, 49.4, 43.0, 36.5, 29.0.

**1-Phenyldecane (2l)<sup>6</sup>**

<sup>1</sup>H NMR (400 MHz, CDCl<sub>3</sub>) δ 7.73 (d, J = 8.5 Hz, 2H), 7.68 (d, J = 8.6 Hz, 2H), 7.59-7.36 (m, 3H). <sup>13</sup>C NMR (100 MHz, CDCl<sub>3</sub>) δ 139.3, 128.5, 128.3, 125.6, 36.1, 33.9, 31.7, 29.8, 29.7, 29.7, 29.6, 29.5, 22.6, 14.1.

**2-Phenylthiophene (2m)<sup>4</sup>**

<sup>1</sup>H NMR (400 MHz, CDCl<sub>3</sub>) δ 7.72 - 7.66 (m, 2H), 7.48 - 7.40 (m, 2H), 7.40 - 7.31 (m, 3H), 7.11 - 7.06 (m, 1H). <sup>13</sup>C NMR (100 MHz, CDCl<sub>3</sub>) δ 144.6, 134.6, 129.7, 129.0, 127.6, 125.7, 124.1, 123.2.

**4-Fluorobiphenyl (4a)<sup>3</sup>**

<sup>1</sup>H NMR (400 MHz, CDCl<sub>3</sub>): δ 7.57-7.52 (m, 4H), 7.438 (t, 2H, J = 15 Hz), 7.37-7.32 (m, 1H), 7.13 (t, 2H, J = 17 Hz); <sup>13</sup>C NMR (100 MHz, CDCl<sub>3</sub>): δ 162.5 (d, J = 245.1 Hz), 140.2, 137.3 (d, J = 3.3 Hz), 128.8, 128.7 (d, J = 7.9 Hz), 127.2, 127.0, 115.6 (d, J = 21.4).

**4-Chlorobiphenyl (4b)<sup>3</sup>**

<sup>1</sup>H NMR (400 MHz, CDCl<sub>3</sub>): δ 7.62-7.49 (m, 4H), 7.48-7.33 (m, 5H); <sup>13</sup>C NMR (100 MHz, CDCl<sub>3</sub>): δ 140.1, 139.8, 133.5, 129.0, 128.5, 127.7, 127.1.

**4-Iodobiphenyl (4c)**<sup>7</sup>

<sup>1</sup>H NMR (400 MHz, CDCl<sub>3</sub>): δ 7.80-7.75 (m, 2H), 7.58-7.53 (m, 2H), 7.44 (t, J = 7.4 Hz, 2H), 7.30-7.39 (m, 3H). <sup>13</sup>C NMR (100 MHz, CDCl<sub>3</sub>): δ 140.9, 140.2, 138.0, 129.2, 129.0, 127.8, 127.0, 93.2.

**p-Terphenyl (5)**<sup>2</sup>

<sup>1</sup>H NMR (400 MHz, CDCl<sub>3</sub>): δ = 7.70-7.63 (m, 8H), 7.50-7.43 (m, 4H), 7.39-7.34 (m, 2H). <sup>13</sup>C NMR (100 MHz, CDCl<sub>3</sub>): δ = 140.9, 140.3, 129.0, 127.7, 127.5, 127.2.

**1-(4-methylphenyl)-naphthalene (9a)**<sup>2</sup>

<sup>1</sup>H NMR (400 MHz, CDCl<sub>3</sub>): δ = 7.91 (t, J = 8.2 Hz, 2H), 7.85 (d, J = 8.2 Hz, 1H), 7.54-7.37 (m, 6H), 7.31 (d, J = 7.6 Hz, 2H), 2.46 (s, 3H); <sup>13</sup>C NMR (100 MHz, CDCl<sub>3</sub>): δ = 140.4, 137.9, 137.1, 133.9, 131.8, 130.1, 129.1, 128.4, 127.6, 127.0, 126.2, 126.1, 125.8, 125.6, 21.4.

**1-(4-methoxyphenyl)-naphthalene (9b)**<sup>2</sup>

<sup>1</sup>H NMR (400 MHz, CDCl<sub>3</sub>): δ = 7.96-7.83 (m, 3H), 7.55-7.41 (m, 6H), 7.05 (d, J = 6.6 Hz, 2H), 3.91 (s, 3H); <sup>13</sup>C NMR (100 MHz, CDCl<sub>3</sub>): δ = 159.1, 140.0, 133.9, 133.2, 131.9, 131.2, 128.4, 127.5, 127.0, 1276.2, 126.1, 125.8, 125.5, 113.9, 55.5.

## 5. Qualitative competition study

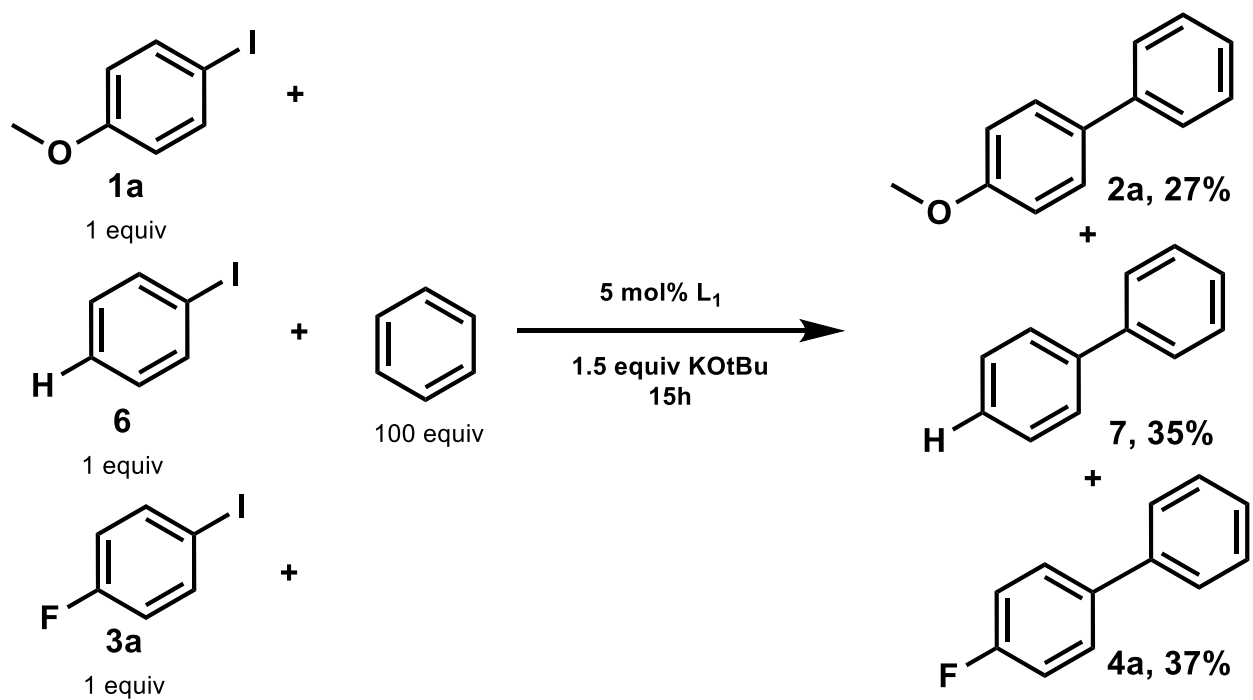

**Scheme S1:** Based on GC-MS analysis.

## 6. ICP-MS analysis on the contents (in ppm) of transition metals (Zn, Ru, Rh, and Pd) in <sup>dm</sup>BIAN

| A Curve Data |                  |                                                                          | Values in ppg (ng/mL) |                   |                                     |                                       |                                       |                                       |
|--------------|------------------|--------------------------------------------------------------------------|-----------------------|-------------------|-------------------------------------|---------------------------------------|---------------------------------------|---------------------------------------|
| Data File    | Sample Name      | Comment                                                                  | Liquid Dilution       | Digestion Factors | 66 -> 66 Zn [ He ]<br>Conc. [ ppb ] | 101 -> 101 Ru [ He ]<br>Conc. [ ppb ] | 103 -> 103 Rh [ He ]<br>Conc. [ ppb ] | 105 -> 105 Pd [ He ]<br>Conc. [ ppb ] |
| RA.d         | Rinse            | Kotono Babaguchi/Michael Findlater Pl - UC Merced                        | 1                     | NA                | 0.39243                             | -0.00007                              | 0.00000                               | -0.00027                              |
| CB1.d        | Center Blank 1   | 9/30/22 He Mode, ppb, 4% (conc.) HCl/1% (conc.) HNO3; Zn, Pd, Ru, and Rh | 1                     | NA                | -0.03031                            | -0.00012                              | 0.00002                               | 0.00002                               |
| CB2.d        | Center Blank 2   | Microwave Digested Sample (0.8mL HCl + 0.2mL HNO3, FV = 20.0mL with MC   | 1                     | NA                | -0.02541                            | -0.00006                              | 0.00001                               | -0.00012                              |
| CB3.d        | Center Blank 3   | IS: Sc, In, Ce, Tm, and Bi @ 750ppb, Inorg Vent                          | 1                     | NA                | -0.75296                            | 0.00011                               | -0.00002                              | 0.00047                               |
| A1A.d        | Standard Blank 1 |                                                                          | 1                     | NA                | 0.43492                             | 0.00010                               | 0.00003                               | 0.00002                               |
| A1B.d        | Standard Blank 2 |                                                                          | 1                     | NA                | -0.04654                            | -0.00006                              | 0.00000                               | -0.00006                              |
| A2A.d        | 0.01             | CMS-2 and Zn - Inorg. Vent.                                              | 1                     | NA                | 1.97276                             | 0.01054                               | 0.00974                               | 0.01030                               |
| A3A.d        | 0.05             |                                                                          | 1                     | NA                | 6.04783                             | 0.05508                               | 0.05123                               | 0.05229                               |
| A4A.d        | 0.1              |                                                                          | 1                     | NA                | 10.78899                            | 0.10120                               | 0.10132                               | 0.09943                               |
| A5A.d        | 0.5              |                                                                          | 1                     | NA                | 50.42593                            | 0.50804                               | 0.49784                               | 0.50084                               |
| A6A.d        | 1                |                                                                          | 1                     | NA                | 99.96588                            | 1.02392                               | 1.00017                               | 0.99648                               |
| A7A.d        | 5                |                                                                          | 1                     | NA                | 495.72575                           | 4.98411                               | 4.98980                               | 5.00432                               |
| A8A.d        | 10               |                                                                          | 1                     | NA                | 964.73445                           | 10.12556                              | 9.98888                               | 10.04959                              |
| RB.d         | Rinse            |                                                                          | 1                     | NA                | -0.29725                            | 0.00017                               | 0.00004                               | 0.00156                               |
| RC.d         | Rinse            |                                                                          | 1                     | NA                | -0.39783                            | 0.00000                               | 0.00008                               | 0.00114                               |
| RD.d         | Rinse            |                                                                          | 1                     | NA                | -0.43040                            | -0.00012                              | 0.00003                               | 0.00044                               |
| ME3ICV1.d    | ME3andICV        | Independent Source: 1ppb ME3 - SPEX; 100ppb ICV - Inorg. Vent.           | 1                     | NA                | 93.70174                            | 0.99677                               | 0.98704                               | 0.98217                               |
| %Recovery    |                  |                                                                          |                       |                   | 93.70                               | 99.68                                 | 98.70                                 | 98.22                                 |
| RE.d         | Rinse            |                                                                          | 1                     | NA                | -0.33264                            | -0.00006                              | 0.00018                               | 0.00009                               |
| Q1A.d        | Q1A              | 0.1ppb CMS-2 and 10ppb Zn - Inorg. Vent.                                 | 1                     | NA                | 10.37983                            | 0.09895                               | 0.09699                               | 0.10104                               |
| %Recovery    |                  |                                                                          |                       |                   | 103.80                              | 98.95                                 | 96.99                                 | 101.04                                |
| Q1B.d        | Q1B              | 0.5ppb CMS-2 and 50ppb Zn - Inorg. Vent.                                 | 1                     | NA                | 49.01677                            | 0.49586                               | 0.48667                               | 0.49751                               |
| %Recovery    |                  |                                                                          |                       |                   | 98.03                               | 99.17                                 | 97.33                                 | 99.50                                 |
| Q1C.d        | Q1C              | 1ppb CMS-2 and 100ppb Zn - Inorg. Vent.                                  | 1                     | NA                | 97.08056                            | 0.97585                               | 0.99052                               | 0.98633                               |
| %Recovery    |                  |                                                                          |                       |                   | 97.08                               | 97.59                                 | 99.05                                 | 98.63                                 |
| R1.d         | Rinse            |                                                                          | 1                     | NA                | -0.52869                            | 0.00005                               | 0.00008                               | -0.00005                              |
| MB.d         | MB               | Method Blank, 100uL MQW, FV = 20.0mL                                     | 1                     | 1.3333            | 3.51674                             | -0.00007                              | 0.00003                               | -0.00014                              |
| 1.d          | 1                | 15.87mg 2,6-Me BIAN, FV = 20.0mL                                         | 10                    | 1.2602            | 0.62163                             | 0.00021                               | 0.00002                               | 0.35626                               |
| 1B.d         | 1                | 15.87mg 2,6-Me BIAN, FV = 20.0mL                                         | 1                     | 1.2602            | 13.34098                            | 0.00219                               | 0.00014                               | 3.60232                               |
| LCS1.d       | LCS1             | LCS1, 100uL 100ppb CMS-2 and 10ppm Zn - Inorg. Vent., FV = 20.0mL        | 1                     | 1.3333            | 55.23404                            | 0.49601                               | 0.49107                               | 0.49508                               |
| %Recovery    |                  |                                                                          |                       |                   | 110.47                              | 99.20                                 | 98.21                                 | 99.02                                 |
| LCS2.d       | LCS2             | LCS2, 100uL 1ppm CMS-2 and 100ppm Zn - Inorg. Vent., FV = 20.0mL         | 1                     | 1.3333            | 526.09162                           | 4.85007                               | 4.84994                               | 4.89385                               |
| %Recovery    |                  |                                                                          |                       |                   | 105.22                              | 97.00                                 | 97.00                                 | 97.88                                 |
| Q2A.d        | Q2A              | 0.1ppb CMS-2 and 10ppb Zn - Inorg. Vent.                                 | 1                     | NA                | 10.15146                            | 0.09804                               | 0.09711                               | 0.09931                               |
| %Recovery    |                  |                                                                          |                       |                   | 101.51                              | 98.04                                 | 97.11                                 | 99.31                                 |
| Q2B.d        | Q2B              | 0.5ppb CMS-2 and 50ppb Zn - Inorg. Vent.                                 | 1                     | NA                | 48.72947                            | 0.48531                               | 0.48320                               | 0.48211                               |
| %Recovery    |                  |                                                                          |                       |                   | 97.46                               | 97.06                                 | 96.64                                 | 96.42                                 |
| Q2C.d        | Q2C              | 1ppb CMS-2 and 100ppb Zn - Inorg. Vent.                                  | 1                     | NA                | 99.14757                            | 0.99685                               | 1.00492                               | 0.98913                               |
| %Recovery    |                  |                                                                          |                       |                   | 99.15                               | 99.69                                 | 100.49                                | 98.91                                 |
| R2.d         | Rinse            |                                                                          | 1                     | NA                | -0.65610                            | -0.00006                              | 0.00000                               | 0.00019                               |

| A Curve Detection Limits |           |     |     |      |                      |          |          |           |          |          |       |
|--------------------------|-----------|-----|-----|------|----------------------|----------|----------|-----------|----------|----------|-------|
| Tune Mode                | Scan Type | Q1  | Q2  | Name | ISTD                 | R        | a        | b (blank) | DL       | BEC      | Units |
| He                       | MS/MS     | 66  | 66  | Zn   | 45 -> 45 Sc [ He ]   | 0.999916 | 0.010211 | 0.019555  | 0.101689 | 1.915138 | ppb   |
| He                       | MS/MS     | 101 | 101 | Ru   | 115 -> 115 In [ He ] | 0.999972 | 0.0053   | 6.35E-07  | 0.000289 | 0.00012  | ppb   |
| He                       | MS/MS     | 103 | 103 | Rh   | 115 -> 115 In [ He ] | 1        | 0.030066 | 9.50E-07  | 8.96E-05 | 3.16E-05 | ppb   |
| He                       | MS/MS     | 105 | 105 | Pd   | 115 -> 115 In [ He ] | 0.999998 | 0.006249 | 3.41E-06  | 0.001086 | 0.000545 | ppb   |

### Zn Residue results:

Residue results were calculated by multiplying the raw result by the liquid dilution and then by the subsequent multiplication by the digestion factor.

There was 2.55(3453) ppm Zn impurity in catalysis from synthesis. There were nearly no Ru, Rh, and Pd detected under ICP-MS analysis.



## 7. General procedure for Ar-BIAN additives

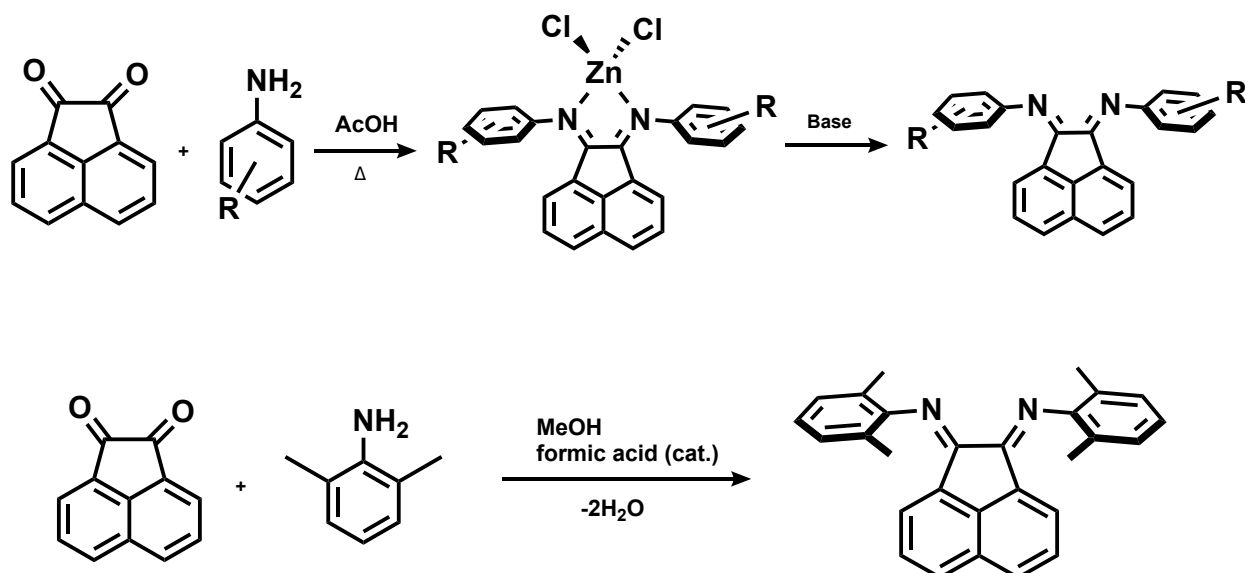

**Scheme S2.** Synthetic strategies of Ar-BIAN compounds with  $\text{Zn}^1$  and adapted current method without any metals

### Adapted procedure without metal<sup>8</sup>:

MeOH (60 ml) was added to a flask charged with acenaphthenequinone (2.00 g, 10.98 mmol) to give a yellow suspension. 2,6-Dimethylaniline (2.974 ml, 24.15 mmol) was syringed in whilst stirring and approximately 0.5 ml of formic acid (cat.) was added. The suspension started to darken to orange and then to red at which point the solid entered into solution and was stirred overnight (16 hours). The solvent was removed under reduced pressure and the residue subjected to dynamic vacuum ( $10^{-3}$  mbar) for six hours. The residue was washed with  $-78^\circ\text{C}$  hexane and the product extracted with room temperature hexane and reduced to minimum volume. Three crops were cooled in pentane to  $-35^\circ\text{C}$ , which deposited yellow/orange crystals that turned red under vacuum (2.692g, 6.92 mmol) in 63% yield, from all three crops. The starting materials were purchased from Sigma-Aldrich and used as received.  $^1\text{H}$  NMR (400 MHz,  $\text{CDCl}_3$ ):  $\delta$  = 7.89 (d,  $J$  = 7.2 Hz, 2H), 7.39 (t,  $J$  = 3.8 Hz, 3H), 7.16 (m, 4H), 7.09 (d,  $J$  = 7.3 Hz, 2H), 6.71 (d,  $J$  = 7.1 Hz, 2H), 2.14 (s, 12H).

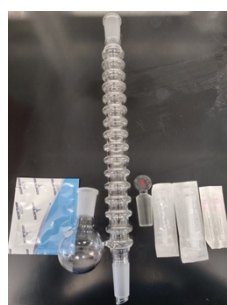

1. All glassware and equipment

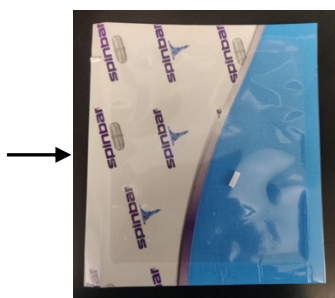

2. New stir bar

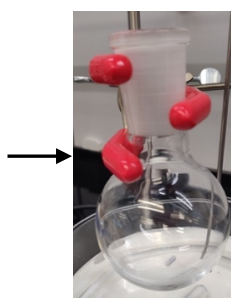

3. Inserted stir bar in a clean flask

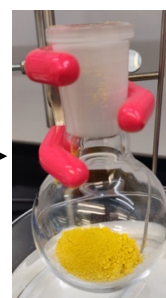

4. Added acenaphthenequinone

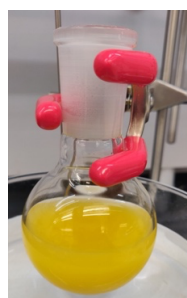

5. Added methanol

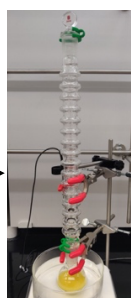

4. Set up

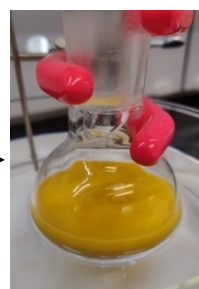

7. Yellow suspension as it began to reflux

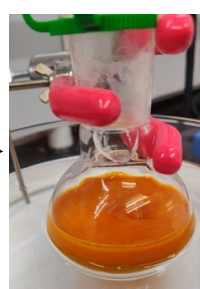

8. Orange suspension after adding acetic acid

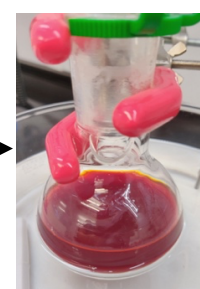

3. Red suspension after adding 2,6-dimethylaniline

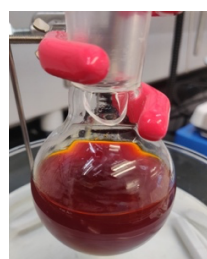

10. After overnight reflux

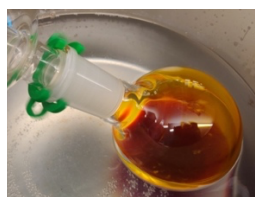

9. The solvent was removed.

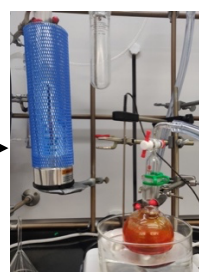

8. The residue was dried over dynamic vacuum.

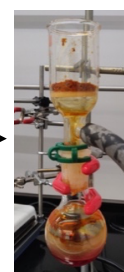

7. The product was filtered.

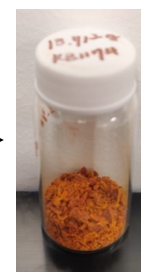

6. Product

**Figure S1.** Synthesis procedure for  $L_1$  without zinc

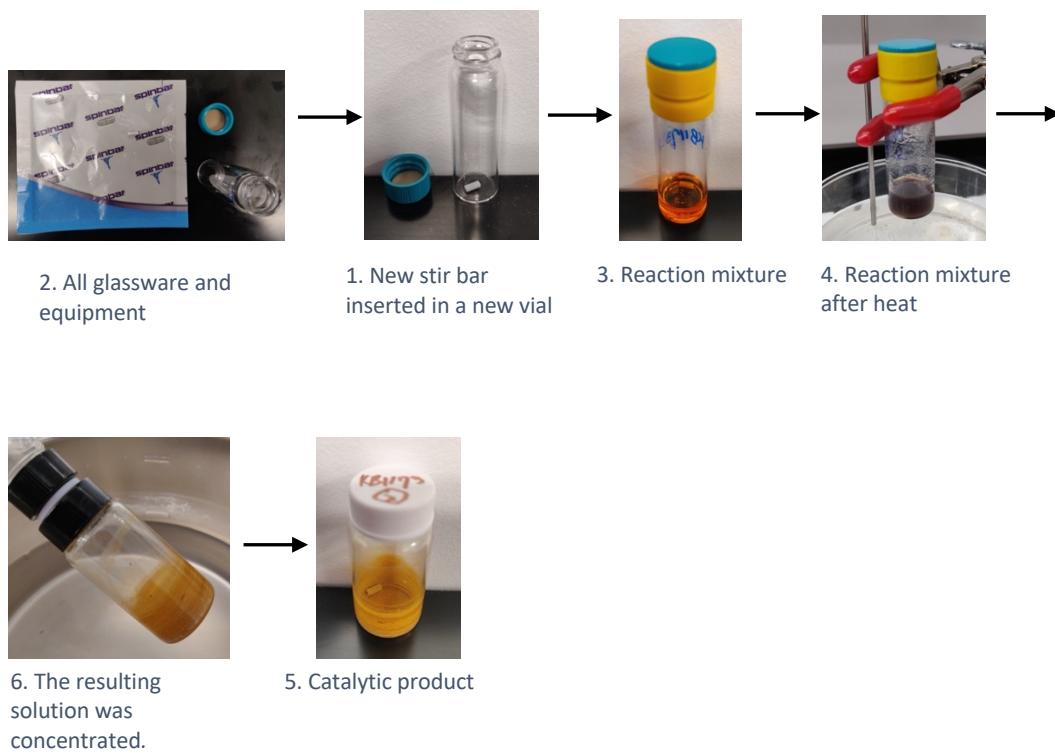

**Figure S2.** Catalytic reaction using the **L<sub>1</sub>** prepared according to zinc-free protocol (see: Figure S1)

## 8. Mechanistic experiment

### 8.1 KIE experiment

C:\Xcalibur\data\Deepika\DB3153\_4\_4MIN

2/4/2021 2:18:47 PM

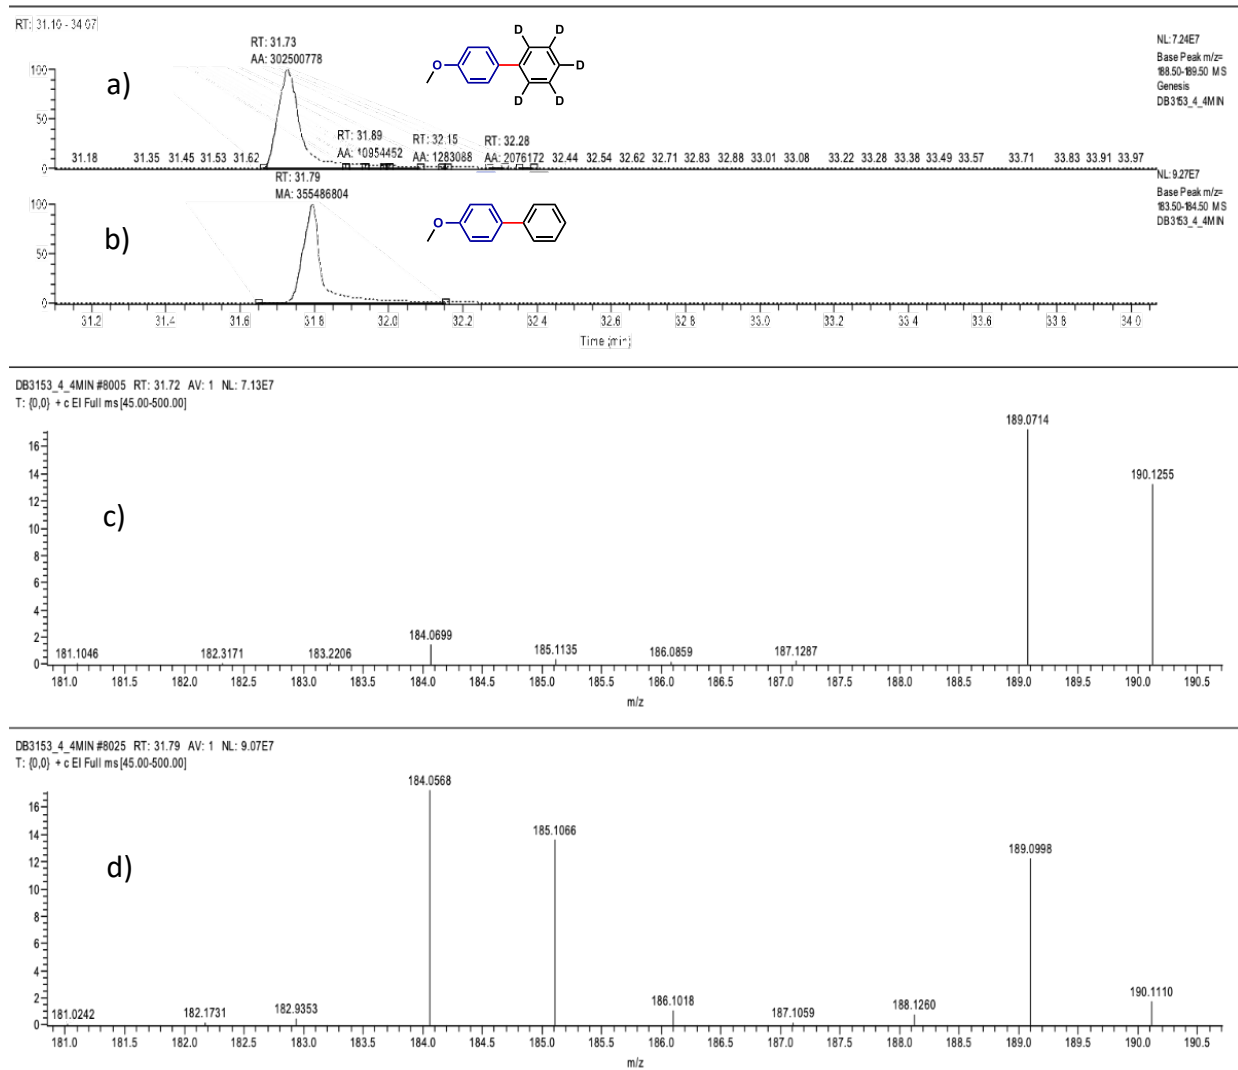

**Figure S3.** GC-MS analysis for KIE experiment. a) The GC analysis obtained the retention time of methoxybiphenyl-d<sub>5</sub> to be 31.72 min while b) the peak for product showed 31.79 min. The predicted m/z value is 189 for methoxybiphenyl-d<sub>5</sub> and 184 for the product. Both of structures were confirmed by the MS spectra of c) and d), and those areas of peaks from GC were used to calculate the KIE accordingly.

## 8.2 Crystal of the catalytic additive intermediate, C18-Crown-6

Preparation of C18-Crown-6:

In a 20 mL reaction vial, L<sub>1</sub> (1 mmol), KOtBu (1.2 mmol) and 18-Crown-6 (1.2 mmol) were charged under an inert atmosphere of a glovebox. To the mixture was added 5 mL of diethyl ether and drops of 1,2-dimethoxyethane followed by stirring for 20 min. After that, the stir bar was removed from the reaction mixture and the solution was kept unperturbed at -30 °C. After 2 days, the solution afforded brown needle-shaped crystals.<sup>3</sup> <sup>1</sup>H NMR (400 MHz, THF-d<sub>8</sub>): δ = 6.78 (d, J = 5.6 Hz, 4H), 6.642 (s, 4H), 6.47 (t, J = 5.74 Hz, 2H), 5.9986 (s, 2H), 3.43 (s, 24H), 2.20 (s, 12H)

X Ray Crystallography: CCDC2309257 contains the supplementary crystallographic data for this paper. The data can be obtained free of charge from the Cambridge Crystallographic Data Centre via [www.ccdc.cam.ac.uk/data\\_request/cif](http://www.ccdc.cam.ac.uk/data_request/cif).

X-Ray crystallographic data and structure refinement:

Formula: C<sub>40</sub> H<sub>48</sub> K N<sub>2</sub> O<sub>6</sub>

Bond precision: C-C = 0.0028 Å

Wavelength: = 1.54184

Crystal system: monoclinic

Space group: P 1 2<sub>1</sub>/c 1

Color of crystal: Brown

Unit cell parameters: a = 16.87115(15) Å α = 90°

b = 14.15084(13) Å β = 90.5169(9)°

c = 17.71183(18) Å γ = 90°

Temperature of data collection: 173(K)

Values of Z and R: Z = 4

R(reflections) = 0.0478(8350), wR2(reflections) = 0.1278(8949)

Radiation type: Mo K/α

Radiation source: sealed X-ray tube

Radiation monochromator: graphite

Measurement device type: XtaLab Synergy by Rigaku Oxford Diffraction

Computing structure solution: OLEX

Computing structure refinement: SHELXL

## 8.3 Reaction with C18-Crown-6

An oven dried 20 mL scintillation vial was charged with C18-Crown-6 (34.6 mg, 0.05 mmol), anhydrous benzene (2 mL), and a stir bar. A bright orange homogenous solution was obtained. Aryl halide (1 mmol) and KOtBu (168.3 mg, 1.5 mmol) were then added to the reaction mixture. The scintillation vial was sealed and then placed on a preheated oil bath at 75 °C for 15 hrs. The reaction was quenched by exposing the reaction mixture to air, then the solvent was then reduced under *vacuo*. NMR yield reported employing hexamethylbenzene.

9.  $^1\text{H}$  and  $^{13}\text{C}$  NMR of isolated C-C formed products and  $^1\text{H}$  of catalytically active species:

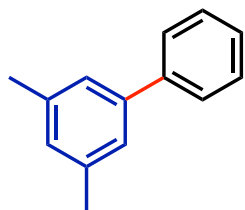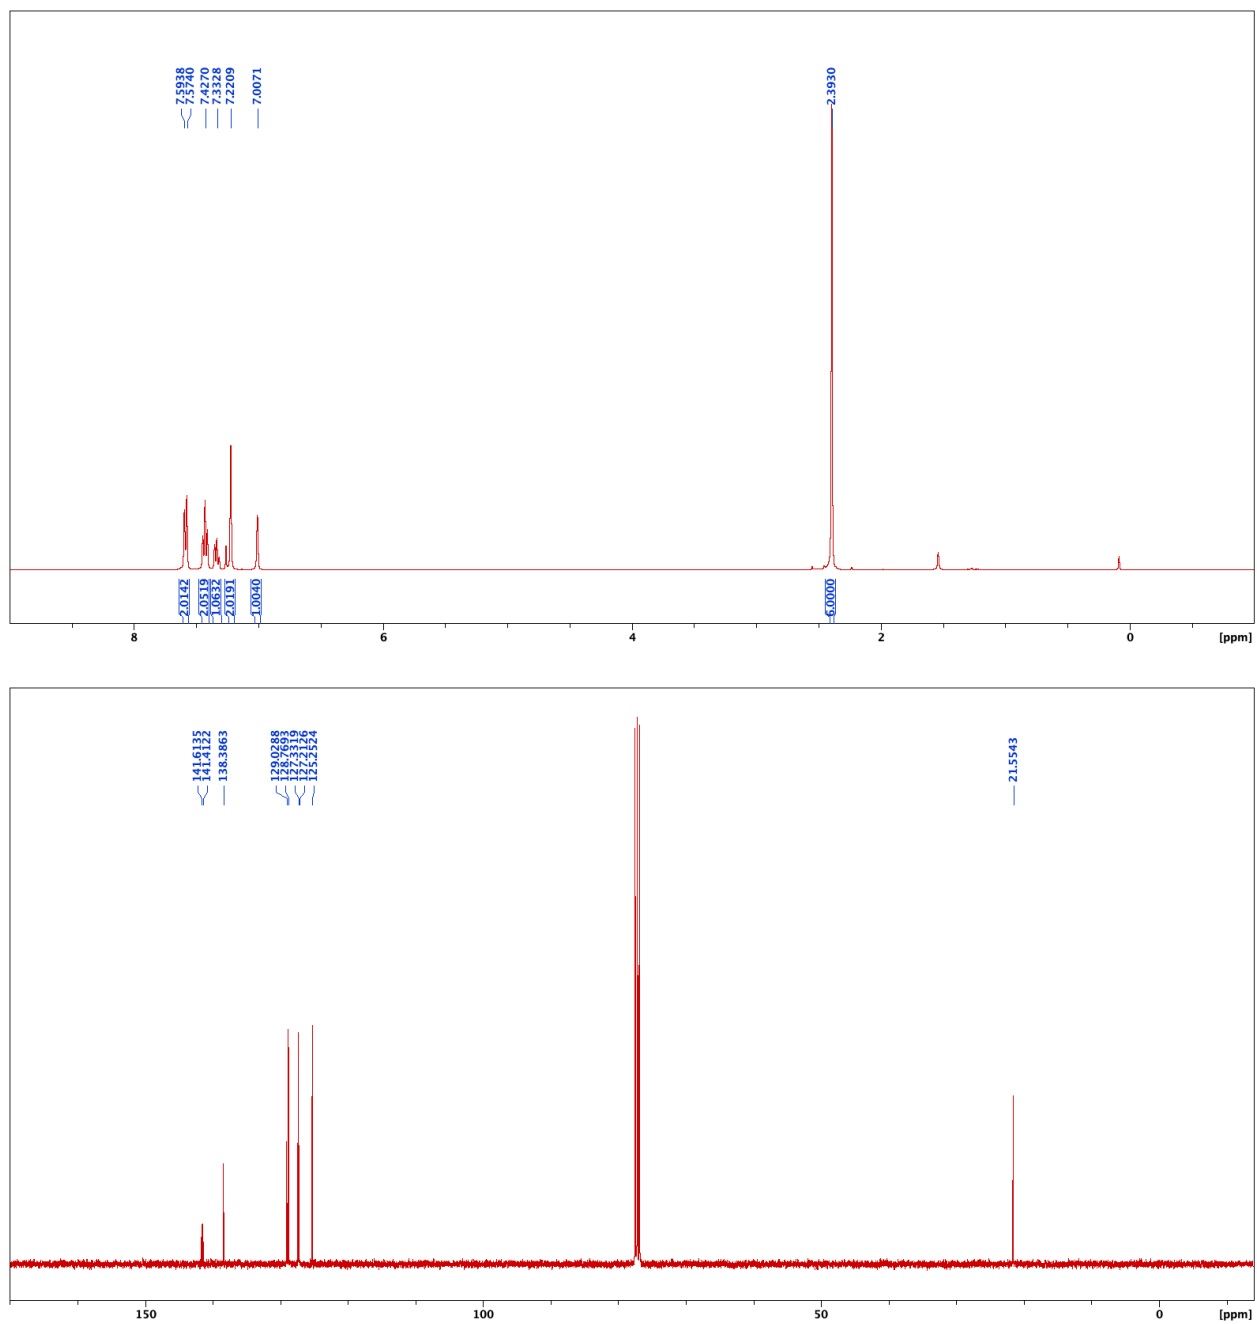

Figure S4.  $^1\text{H}$  and  $^{13}\text{C}$  of 3,5-Dimethylbiphenyl (**2e**)

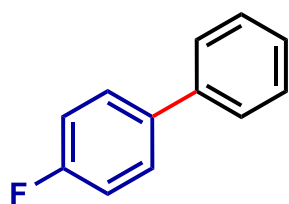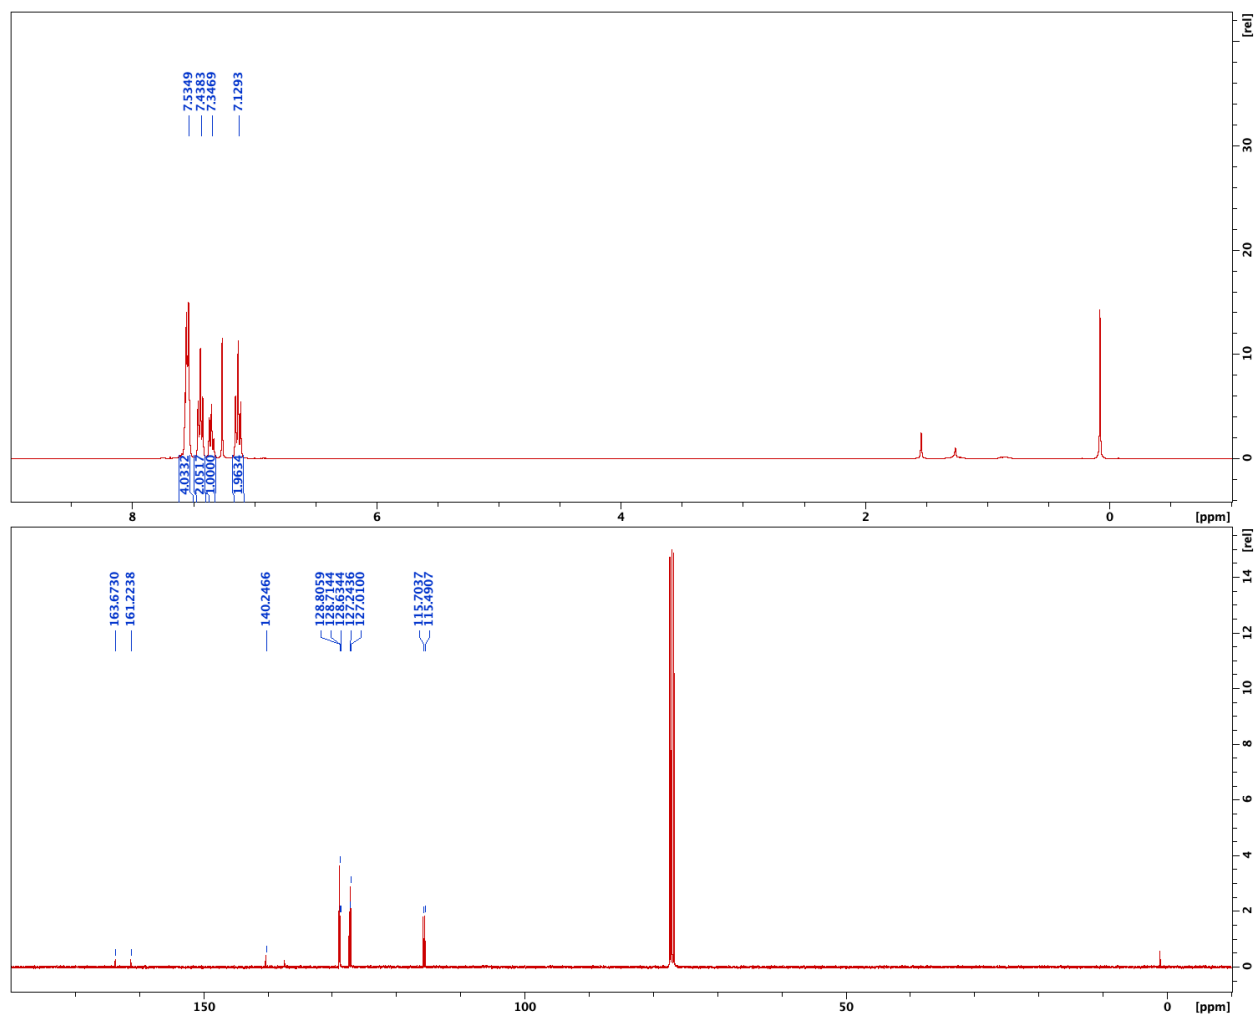

Figure S5. <sup>1</sup>H and <sup>13</sup>C of 4-Fluorobiphenyl (4a)

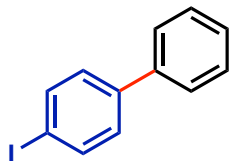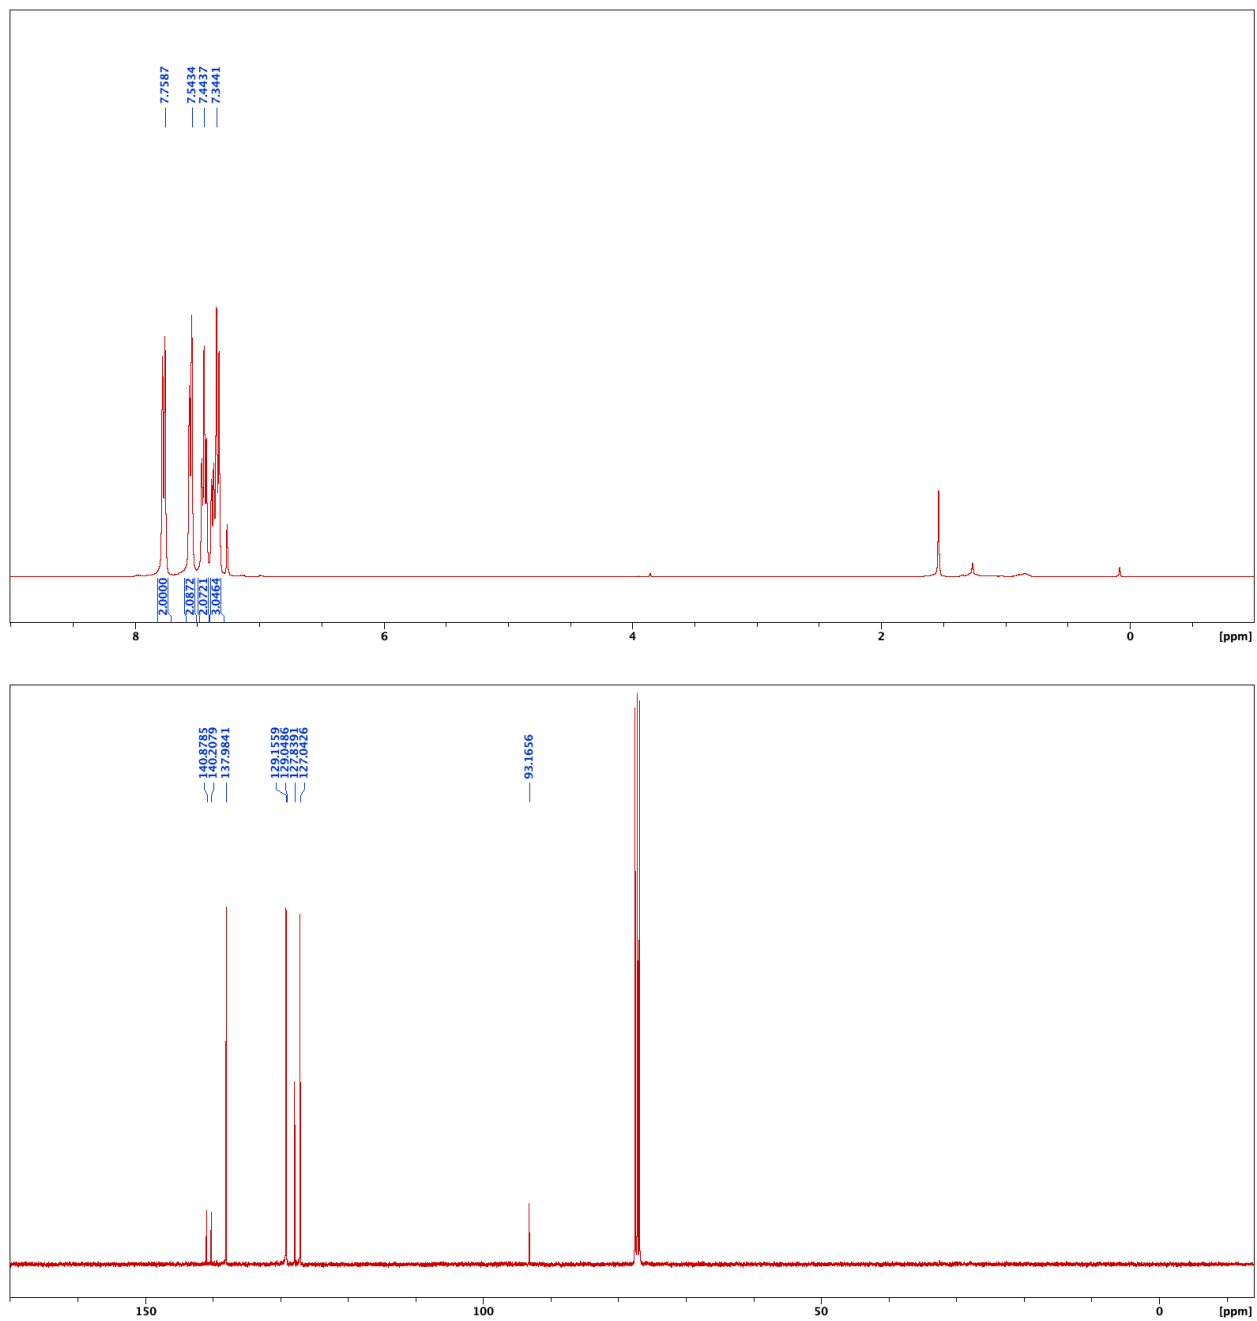

Figure S5.  $^1\text{H}$  and  $^{13}\text{C}$  of 4-Iodobiphenyl (**4c**)



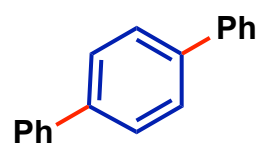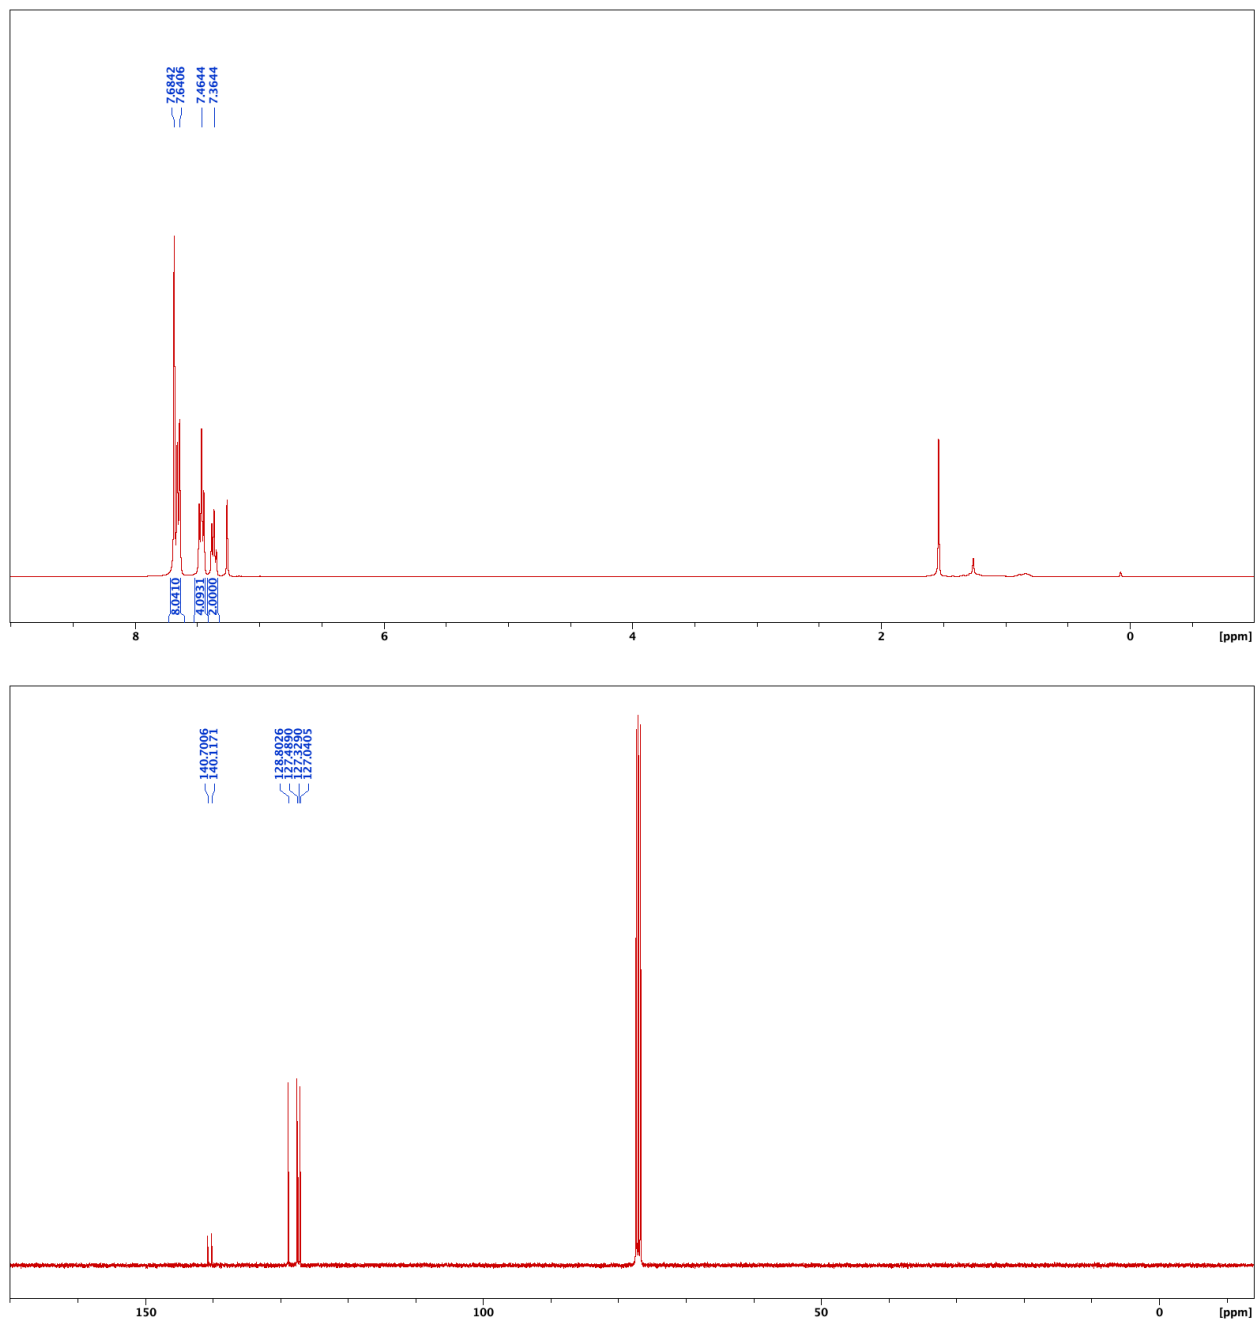

Figure S5. <sup>1</sup>H and <sup>13</sup>C of *p*-Terphenyl (5)

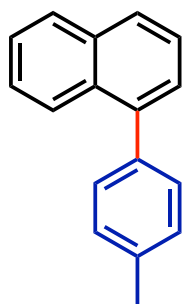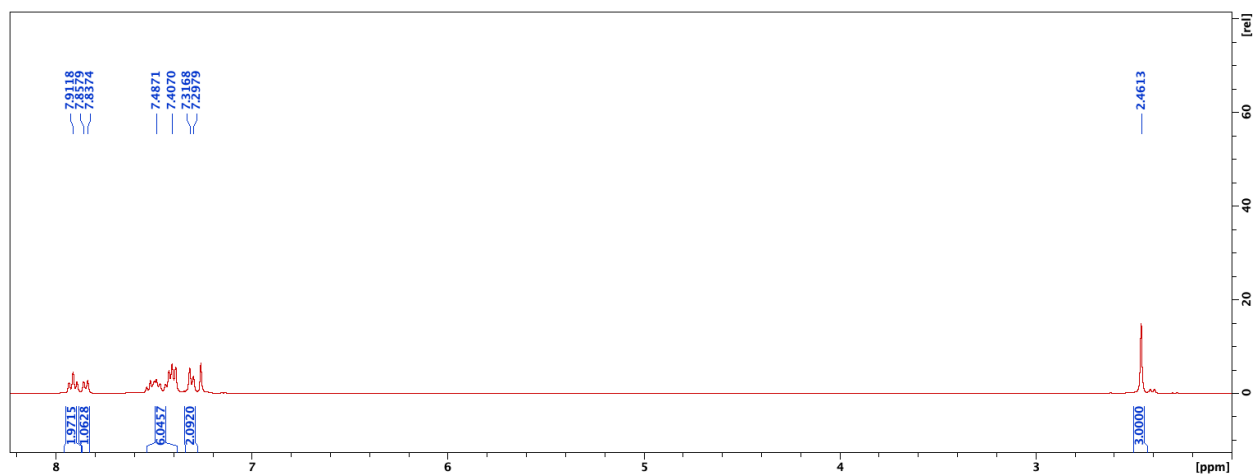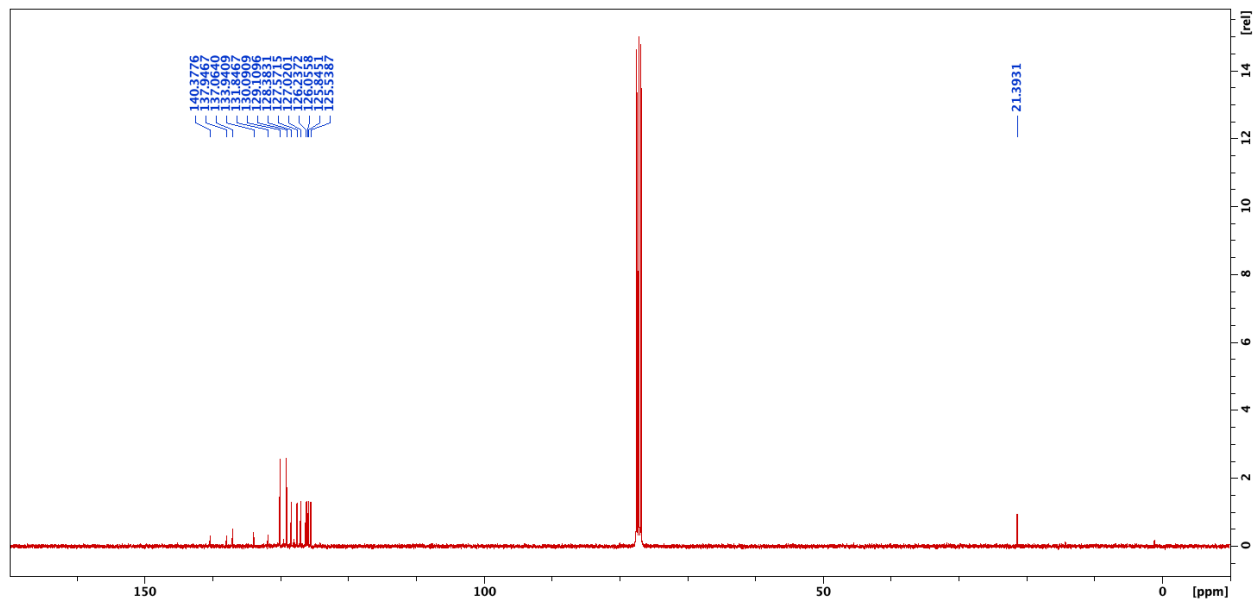

Figure S6. <sup>1</sup>H and <sup>13</sup>C of 1-(4-methylphenyl)-naphthalene (9a)

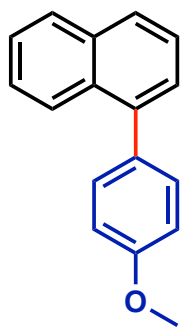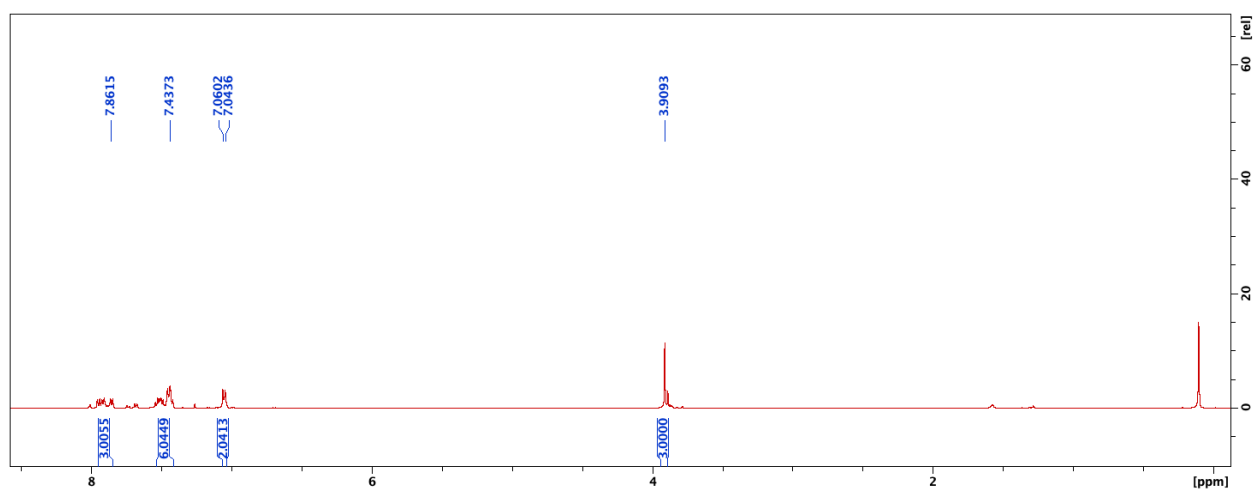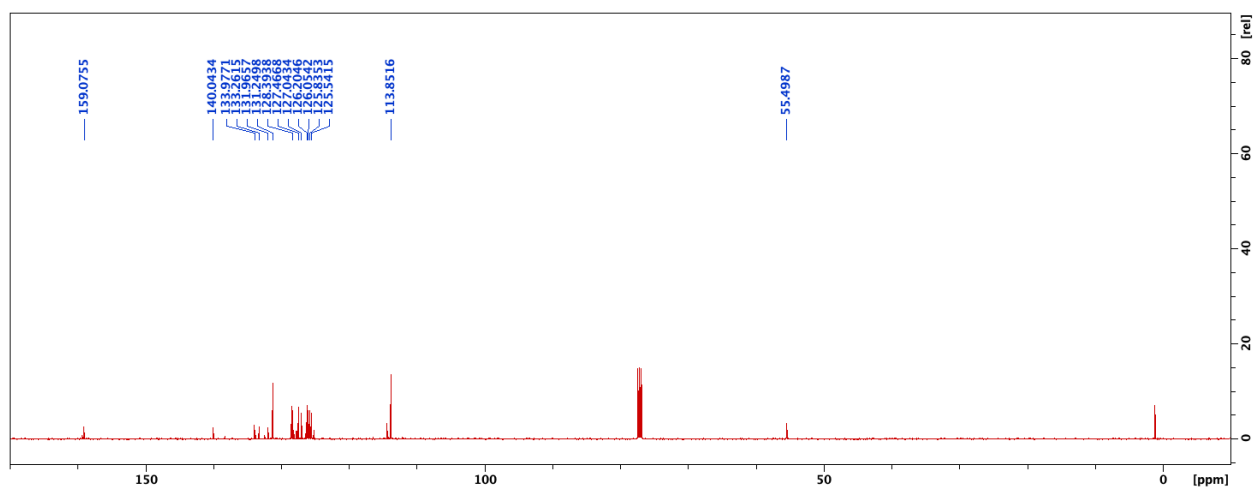

Figure S7. <sup>1</sup>H and <sup>13</sup>C of 1-(4-methoxyphenyl)-naphthalene (9b)

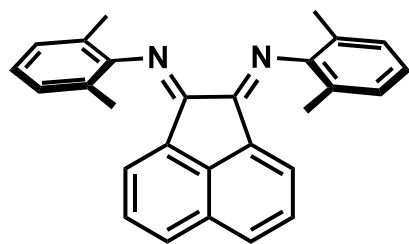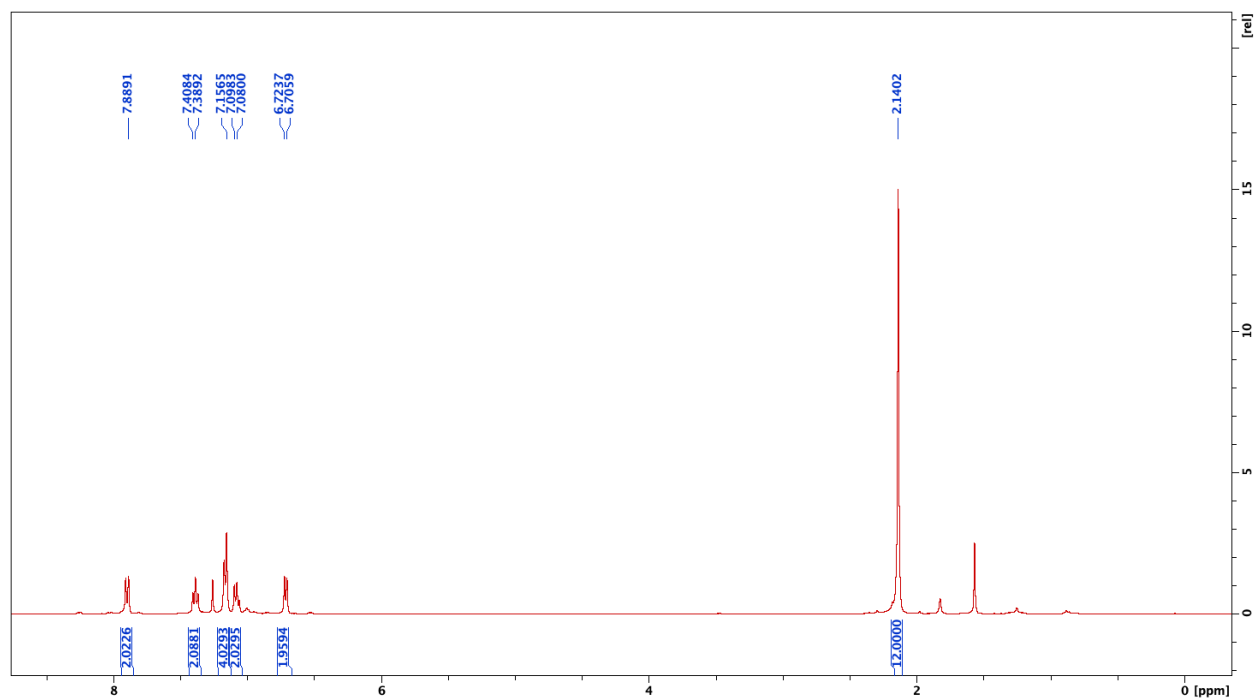

Figure S8.  $^1\text{H}$  of L<sub>1</sub>, 2,6-dimethylBIAN.

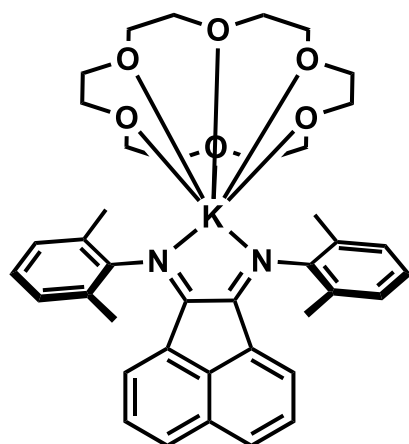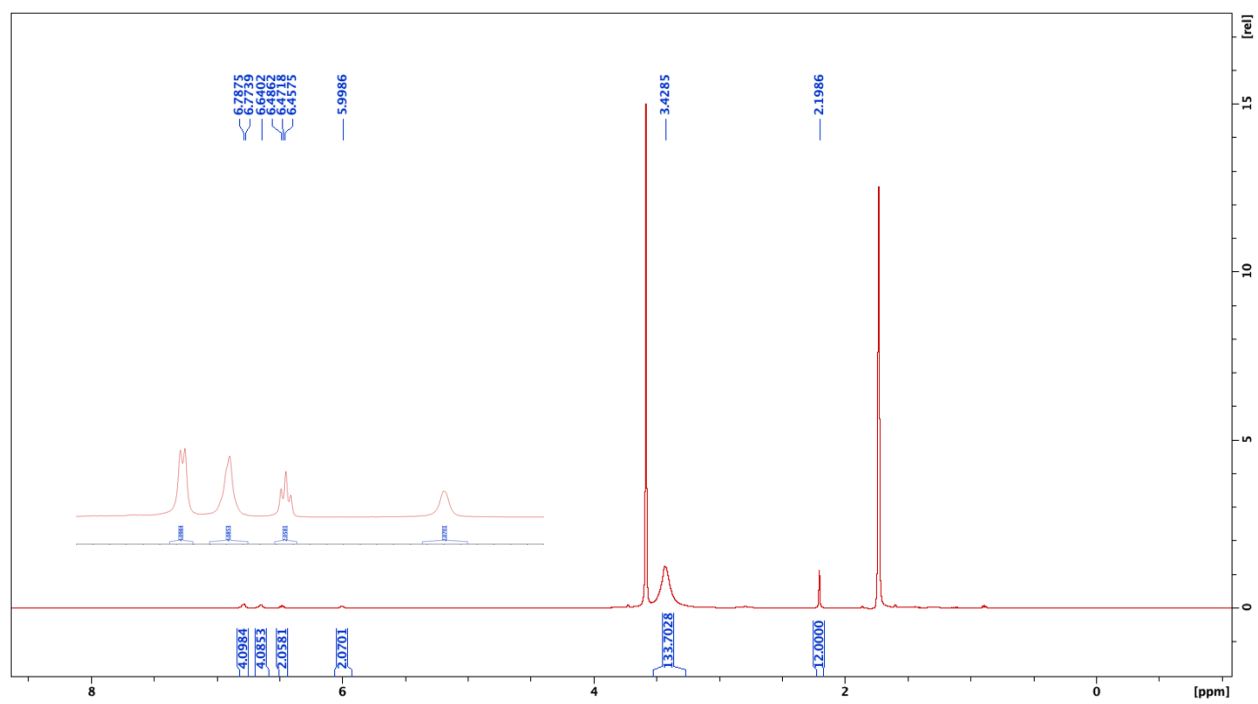

Figure S9. <sup>1</sup>H of C18-Crown-6

## References

1. M. A. Chacon-Teran and M. Findlater, *Eur. J. Inorg. Chem.*, 2022, **2022**.
2. C.-L. Sun, H. Li, D.-G. Yu, M. Yu, X. Zhou, X.-Y. Lu, K. Huang, S.-F. Zheng, B.-J. Li and Z.-J. Shi, *Nat. Chem.*, 2010, **2**, 1044-1049.
3. A. Kundu, D. Dey, S. Pal and D. Adhikari, *J. Org. Chem.*, 2021, **86**, 15665-15673.
4. D. Martinez-Solorio, B. Melillo, L. Sanchez, Y. Liang, E. Lam, K. N. Houk and A. B. Smith, III, *J. Am. Chem. Soc.*, 2016, **138**, 1836-1839.
5. F. Toriyama, J. Cornella, L. Wimmer, T.-G. Chen, D. D. Dixon, G. Creech and P. S. Baran, *J. Am. Chem. Soc.*, 2016, **138**, 11132-11135.
6. S. Kawamura, K. Ishizuka, H. Takaya and M. Nakamura, *Chem. Commun.*, 2010, **46**, 6054-6056.
7. W. Liu, P. Liu, L. Lv and C.-J. Li, *Angew. Chem. Int. Ed.*, 2018, **57**, 13499-13503.
8. J.-C. Buffet, Z. R. Turner, R. T. Cooper and D. O'Hare, *Polym. Chem.*, 2015, **6**, 2493-2503.
